# Supplementary material for: Detyrosinated α-Tubulin, Vimentin and PD-L1 in Circulating Tumor Cells (CTCs) Isolated from Non-Small Cell Lung Cancer (NSCLC) Patients
Source: MDPI journal article supplement (doi:10.3390/jpm12020154), 2022-01-25

**Table S1.** Patients' Characteristics.

| <b>Treatment-naïve (1st line)</b> |            | <b>Pre-treated (advanced disease)</b>          |            |
|-----------------------------------|------------|------------------------------------------------|------------|
| Number of patients enrolled       | 33         | Number of patients enrolled                    | 27         |
| Age, years, median (range)        | 64 (44–81) | Age, years, median (range)                     | 62 (32–80) |
|                                   | N (%)      |                                                | N (%)      |
| Sex                               |            | Sex                                            |            |
| Female                            | 5 (15.2%)  | Female                                         | 6 (22.2%)  |
| Male                              | 28 (84.8%) | Male                                           | 21 (77.8%) |
| Stage                             |            | Stage                                          |            |
| IV (M1a)                          | 5 (15.2%)  | IV (M1a)                                       | 4 (14.8%)  |
| IV (M1b)                          | 5 (15.2%)  | IV (M1b)                                       | 11 (40.8%) |
| IV                                | 4 (12.1%)  | IV                                             | 4 (14.8%)  |
| IIIA (T3N2M0)                     | 1 (3%)     | Unknown                                        | 8 (29.6%)  |
| IIIB (T4)                         | 1 (3%)     |                                                |            |
| Unknown                           | 17 (51.5%) |                                                |            |
| Histology                         |            | Histology                                      |            |
| Squamous cell carcinoma           | 6 (18.2%)  | Squamous cell carcinoma                        | 7 (26%)    |
| Adenocarcinoma                    | 9 (27.3%)  | Adenocarcinoma                                 | 13 (48.1%) |
| Sarcomatoid carcinoma             | 2 (6%)     | Low differentiation squamous                   | 1 (3.7%)   |
| Unknown                           | 16 (48.5%) | Undifferentiated                               | 2 (7.4%)   |
|                                   |            | Large cell adenocarcinoma +<br>bronchocellular | 1 (3.7%)   |
|                                   |            | Unknown                                        | 3 (11.1%)  |
| HLA-A2 status                     |            | HLA-A2 status                                  |            |
| Positive                          | 6 (18.2%)  | Positive                                       | 11 (40.7%) |
| Negative                          | 9 (27.3%)  | Negative                                       | 14 (51.9%) |
| Unknown                           | 18 (54.5%) | Unknown                                        | 2 (7.4%)   |
| EGFR status                       |            | EGFR status                                    |            |
| WT                                | 9 (27.3%)  | WT                                             | 16 (59.3%) |
| Unknown                           | 24 (72.7%) | Unknown                                        | 11 (40.7%) |
|                                   |            | Line of treatment                              |            |
|                                   |            | First                                          | 1 (3.7%)   |
|                                   |            | Second                                         | 7 (25.9%)  |
|                                   |            | Third                                          | 9 (33.3%)  |
|                                   |            | ≥ Fourth                                       | 8 (29.6%)  |
|                                   |            | Unknown                                        | 2 (7.5%)   |

Figure S1.

Suppl. Figure 1

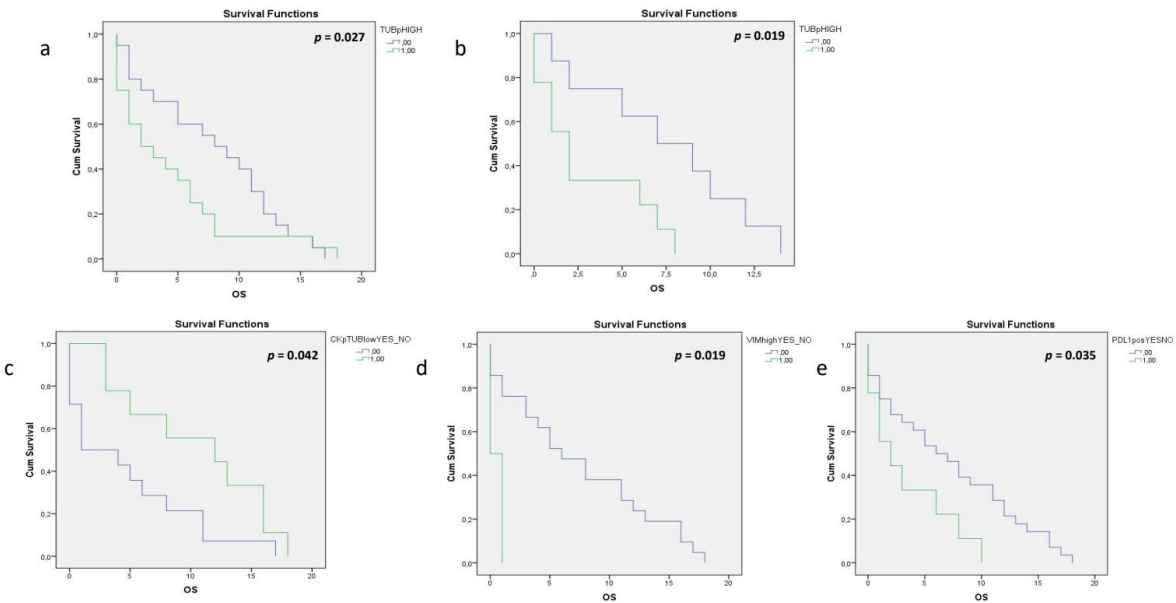

Supplement: s1 [file s1]
